# Supplementary material for: Comprehensive analysis of circRNAs from cashmere goat skin by next generation RNA sequencing (RNA-seq)
Source: PubMed Central journal article supplement (PMC6965140; doi:10.1038/s41598-019-57404-9), 2020-01-16
Supplement: 41598_2019_57404_MOESM1_ESM.pdf [file 41598_2019_57404_MOESM1_ESM.pdf]

# Comprehensive analysis of circRNAs from cashmere goat skin by next generation RNA sequencing (RNA-seq)

Yuanyuan Zheng<sup>1</sup>, Taiyu Hui<sup>1</sup>, Chang Yue<sup>1</sup>, Jiaming Sun<sup>1</sup>, Dan Guo<sup>2</sup>, Suling Guo<sup>3</sup>, Suping Guo<sup>1</sup>, Bojiang Li<sup>1</sup>, Zeying Wang<sup>1,\*</sup>, Wenlin Bai<sup>1,\*</sup>

Table S1. Primer of circRNAs

| name          | Primer sequence               | Annealing temperature (°C) | product |
|---------------|-------------------------------|----------------------------|---------|
| C-GAPDH-F:    | 5' TGTTTGTGATGGGCGTGAA 3'     | 58.4                       | 173bp   |
| C-GAPDH-R:    | 5' AGTCTTCTGGGTGGCAGTGAT 3'   | 58.4                       |         |
| circRNA815-F  | 5' CTAATGCCTTGGATGAGAAACA 3'  | 57.4                       | 155bp   |
| circRNA815-R  | 5' ATGTTGAAGCCCACTGTAGGTAT 3' | 57.6                       |         |
| ciRNA6691-F   | 5' GGAGCACAACCTCTACCACCTA 3'  | 58.0                       | 214bp   |
| ciRNA6691-R   | 5' CCTCCTTCACAGTAATCCATCAC 3' | 58.6                       |         |
| ciRNA652-F    | 5' ACCATATGACTGCAGAGAAGGG 3'  | 58.4                       | 178bp   |
| ciRNA652-R    | 5' CTGTGACTGGGAACGGGTT 3'     | 57.6                       |         |
| circRNA5184-F | 5' ACAGCCTTGATCCAGAGCAGA 3'   | 59.7                       | 146bp   |
| circRNA5184-R | 5' CCAACAATCCGTTTCATAGCAT 3'  | 59.5                       |         |
| circRNA3084-F | 5' CTCACCTCACCGTATTTTTTGC 3'  | 59.3                       | 183bp   |
| circRNA3084-R | 5' ATGCCTGAACAGGTGCAATAAC 3'  | 59.4                       |         |
| circRNA1167-F | 5' TGGGAAGAAGGCGAAATACC 3'    | 59.3                       | 204bp   |
| circRNA1167-R | 5' TGGCACATAGAGGTAAGGAAAGA 3' | 58.3                       |         |
